# Supplementary material for: Boosting the maximized output energy density of triboelectric nanogenerators
Source: Royal Society of Chemistry journal article supplement (doi:10.1039/d4ee01493f), 2024-01-01
Supplement: d4ee01493f1.pdf [file d4ee01493f1.pdf]

Supporting Information

**Boosting the maximized output energy density of  
triboelectric nanogenerator**

Ru Guo<sup>1</sup>, Xin Xia<sup>2</sup>, Hang Luo<sup>5</sup>, Dou Zhang<sup>5</sup>, Yunlong Zi<sup>\*1,2,3,4</sup>

1 Department of Mechanical and Automation Engineering, The Chinese University of Hong Kong, Shatin, N.T. Hong Kong, China

2 Thrust of Sustainable Energy and Environment, The Hong Kong University of Science and Technology (Guangzhou), Nansha, Guangzhou, Guangdong, 511400, China

3 HKUST Shenzhen-Hong Kong Collaborative Innovation Research Institute, Futian, Shenzhen, Guangdong, 518048, China

4 Guangzhou HKUST Fok Ying Tung Research Institute, Nansha, Guangzhou, Guangdong 511457, China

5 Powder Metallurgy Research Institute, State Key Laboratory of Powder Metallurgy, Central South University, Changsha, 410083, Hunan Province, China

E-mail: ylzi@hkust-gz.edu.cn

(a)

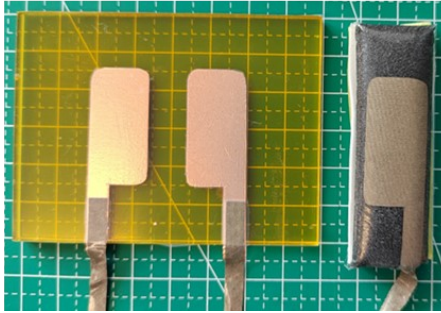

(b)

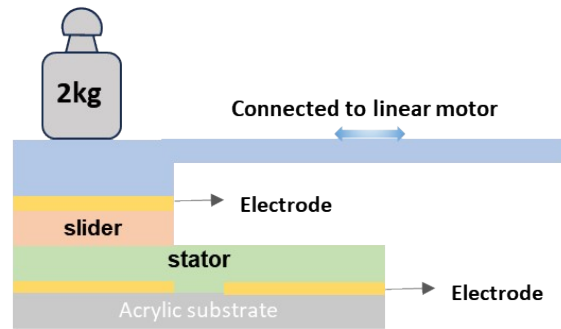

**Supplementary Figure 1.** (a) Optical photo of the fabricated SFT-TENG device (stator and slider). (b) Schematic diagram of the experimental setup.

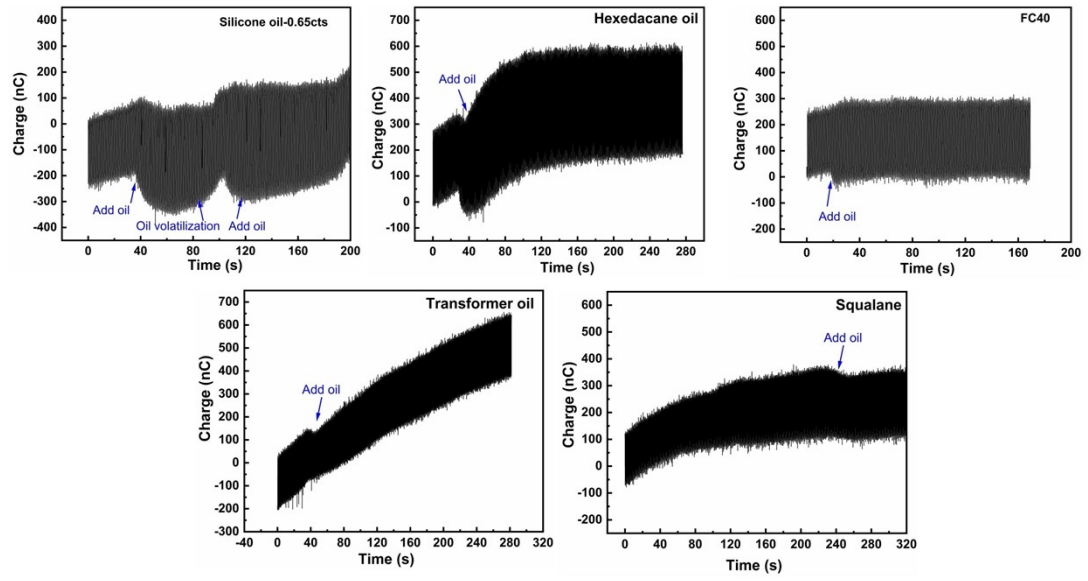

**Supplementary Figure 2.** Selection of insulating oil kind.  $Q_{sc}$  curve of SFT-TENG when adding different liquids oil onto friction surface.

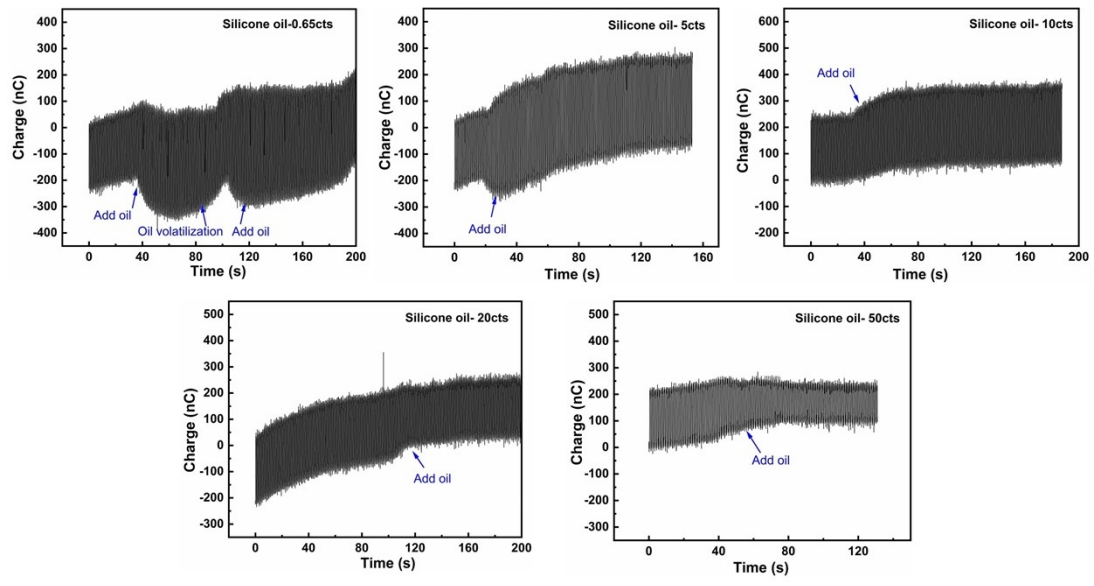

**Supplementary Figure 3.** Selection of silicon oil viscosity. (a)  $Q_{sc}$  curve of SFT-TENG when adding silicon oil with different viscosity onto friction surface.

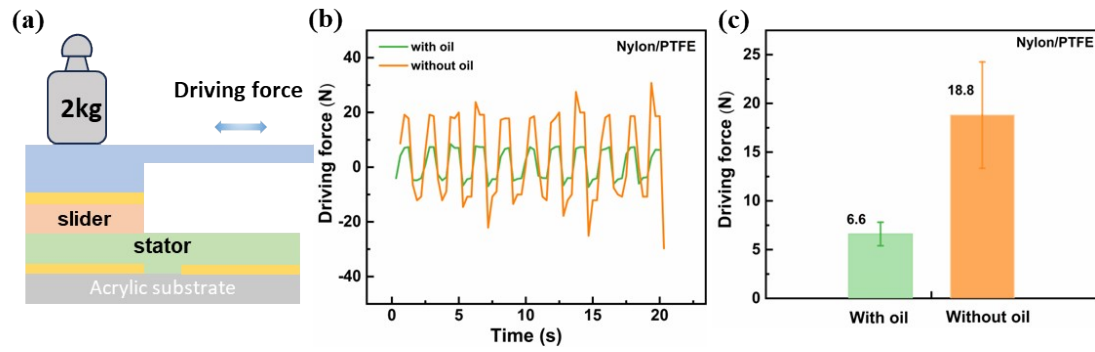

**Supplementary Figure 4.** Driving force of TENG under loading force of 20N. (a) Schematic of testing setup. (b) Dynamic force for driving the sliding part. (c) The statistics driving force of TENG in air and oil, respectively.

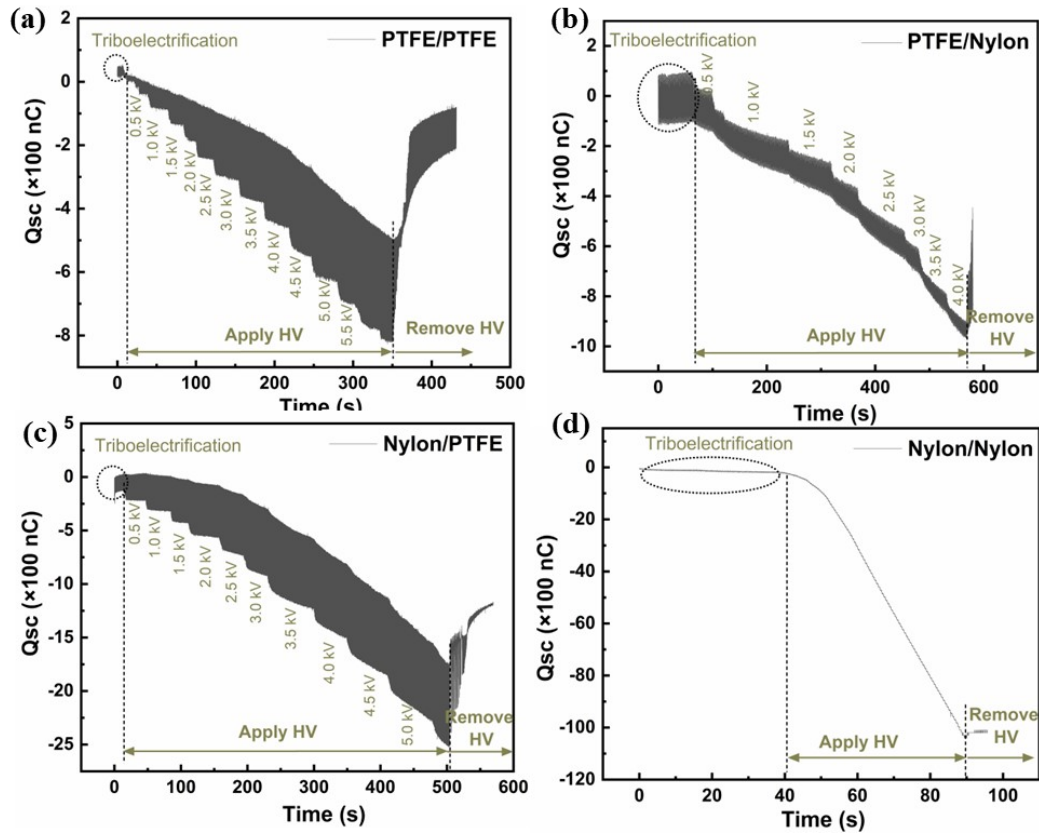

**Supplementary Figure 5.** The  $Q_{sc}$  curve of SFT-TENG under HV excitation with different combinations of Nylon and PTFE as slider and stator materials. (a) PTFE/PTFE pair, (b) Nylon/PTFE pair, (c) PTFE/Nylon pair, (d) Nylon/Nylon pair.

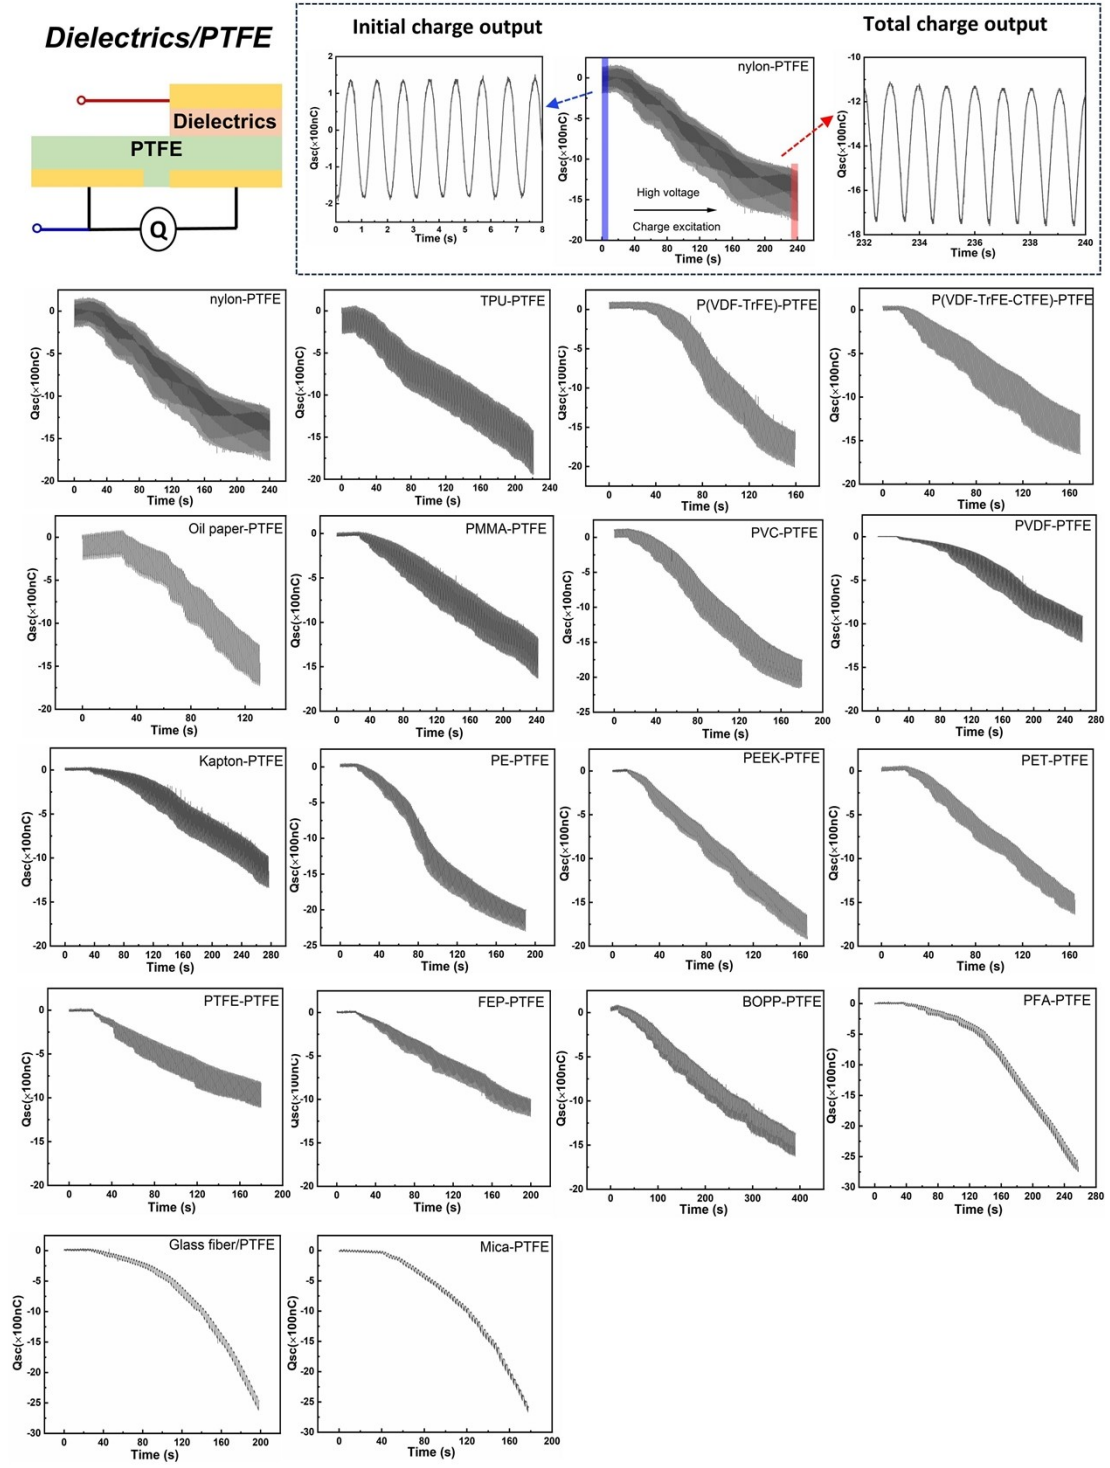

**Supplementary Figure 6.** Material selection of slider dielectric when using PTFE as the stator.

The charge accumulation curve of SFT-TENG with different dielectric/PTFE pairs under high voltage.

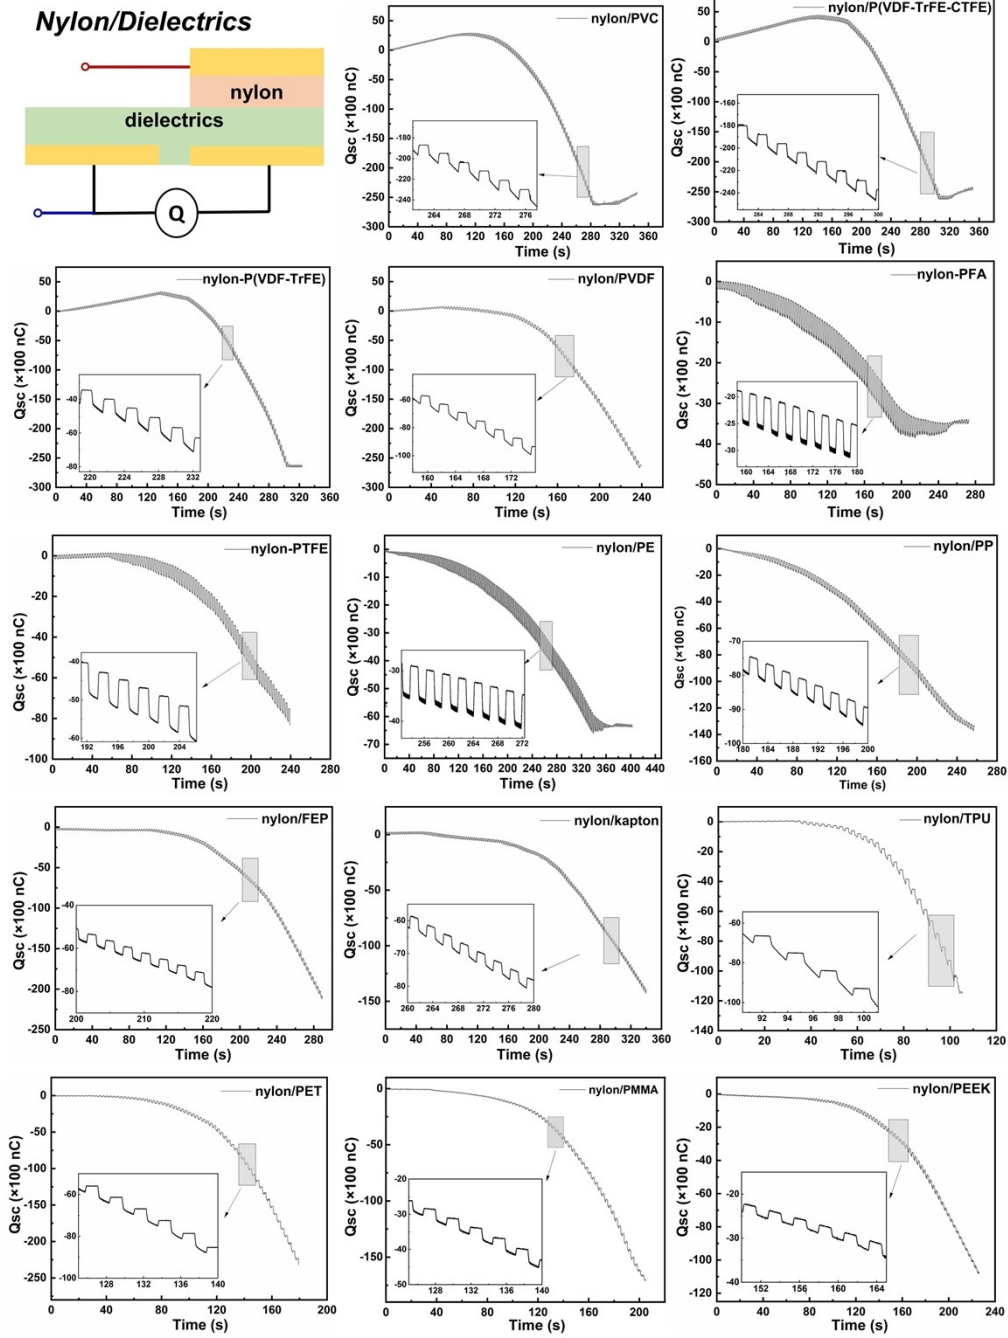

**Supplementary Figure 7.** Material selection of stator dielectric when using nylon as slider.

The charge accumulation curve of SFT-TENG with different dielectric/PTFE pairs under high voltage. The drifting charge curve is observed due to the leakage current characteristic of different stator materials. The local enlarged charge curve is present in each inset figure to clearly show the details of output charge variation.



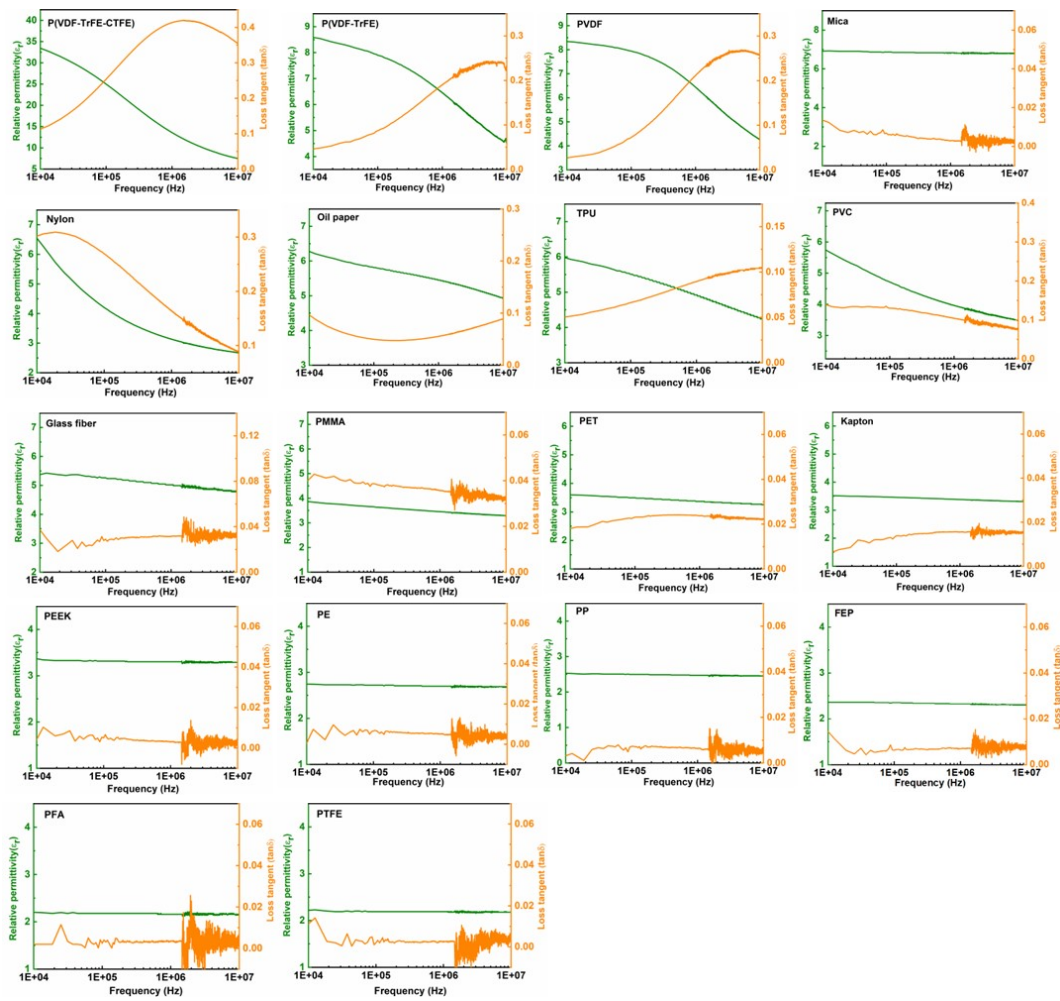

**Supplementary Figure 8.** Frequency dependence curve of relative permittivity ( $\epsilon_r$ ) and loss tangent ( $\tan \delta$ ) for 18 kinds of tribomaterials used in SFT-TENG.

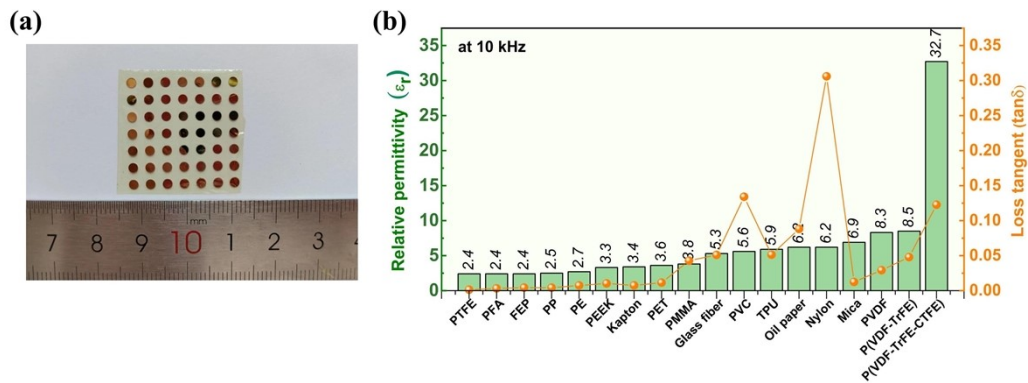

**Supplementary Figure 9.** (a) The tribomaterials film with sputtered gold electrode for electrical properties characterization. (b) Comparison of relative permittivity ( $\epsilon_r$ ) and loss tangent ( $\tan \delta$ ) of tribomaterials at 10 kHz.

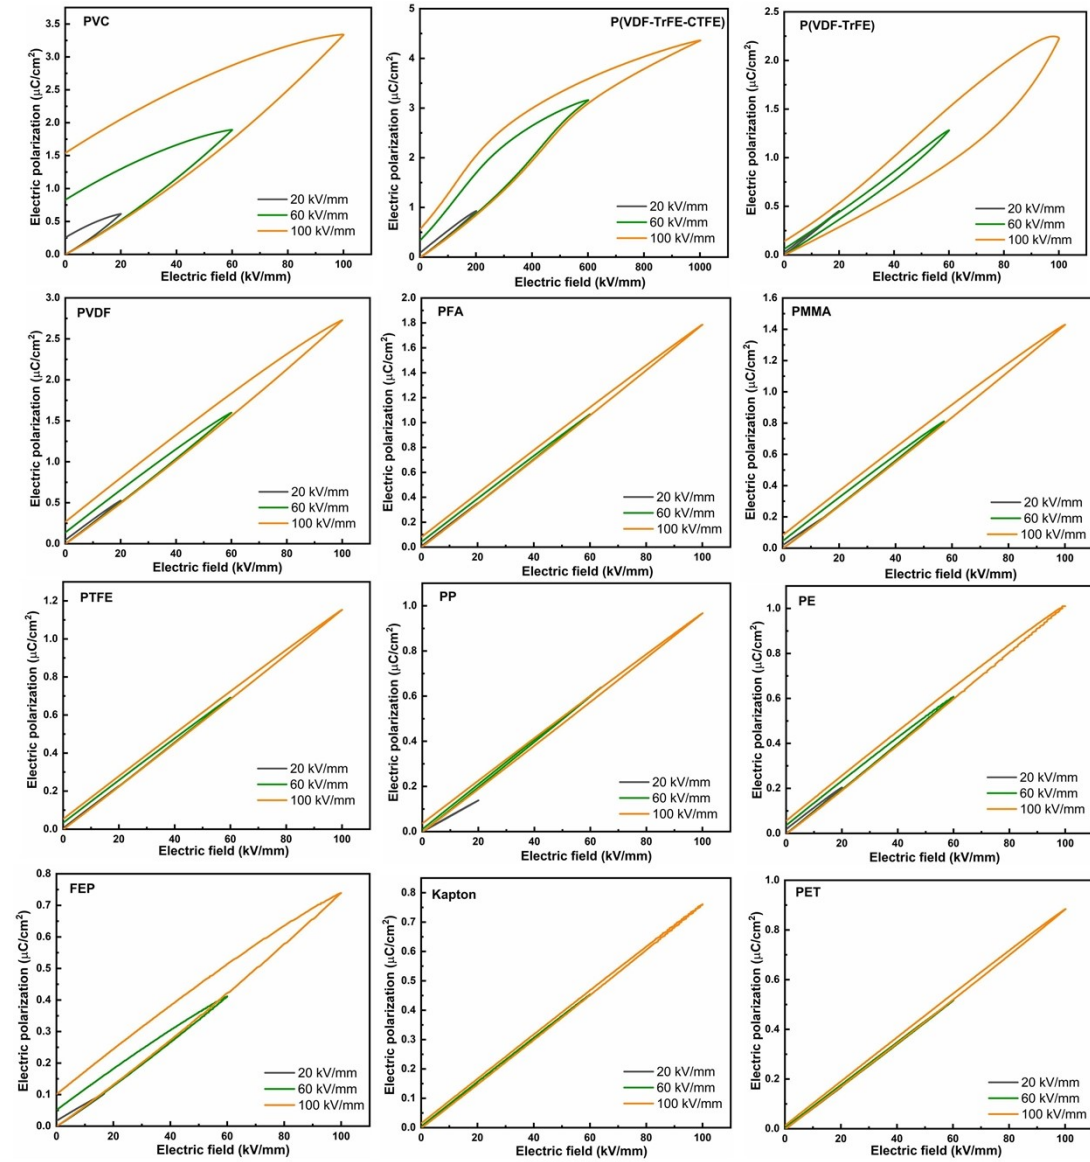

**Supplementary Figure 10.** The electric polarization hysteresis loops ( $P$ - $E$  loop) of tribomaterials under high voltage.

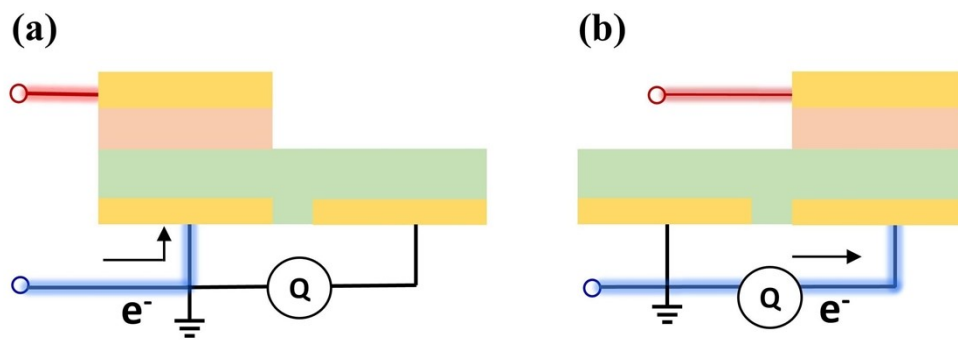

**Supplementary Figure 11.** The effect of external potential of high voltage source on the output circuit of TENG.

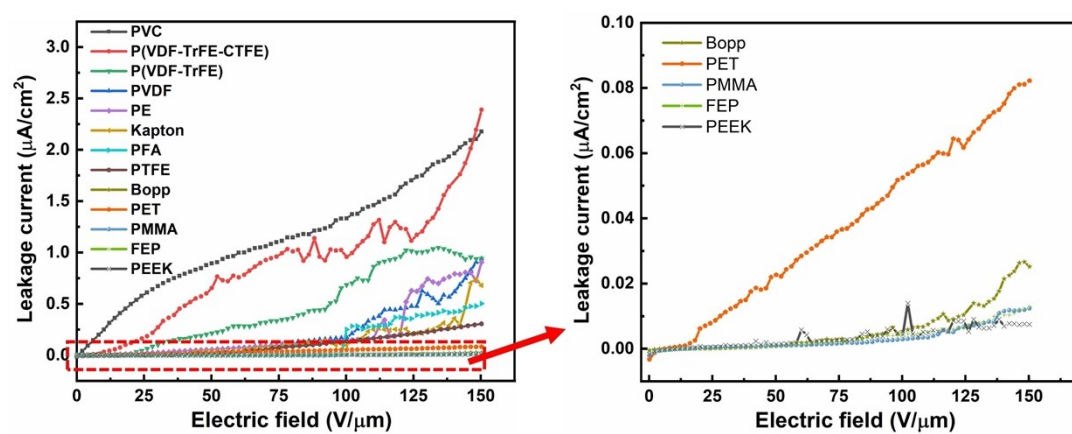

**Supplementary Figure 12.** The leakage current of tribomaterials under high voltage.

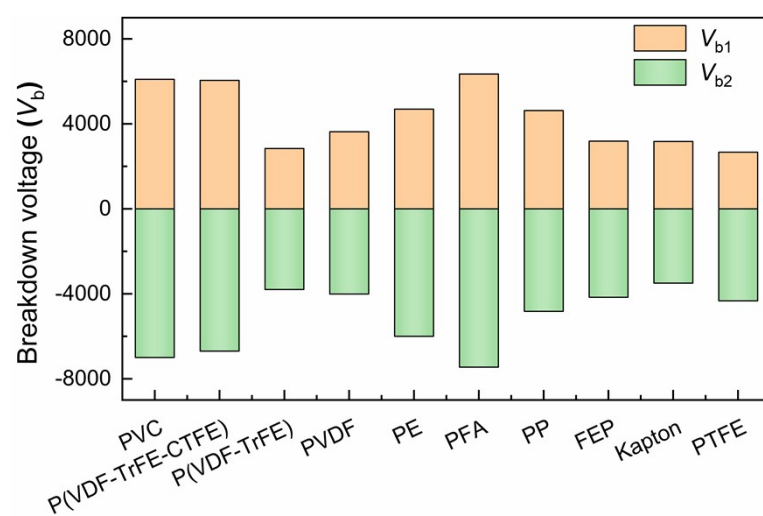

**Supplementary Figure 13.** The electric breakdown voltage ( $V_b$ ) of SFT-TENG with different nylon/dielectrics pairs.

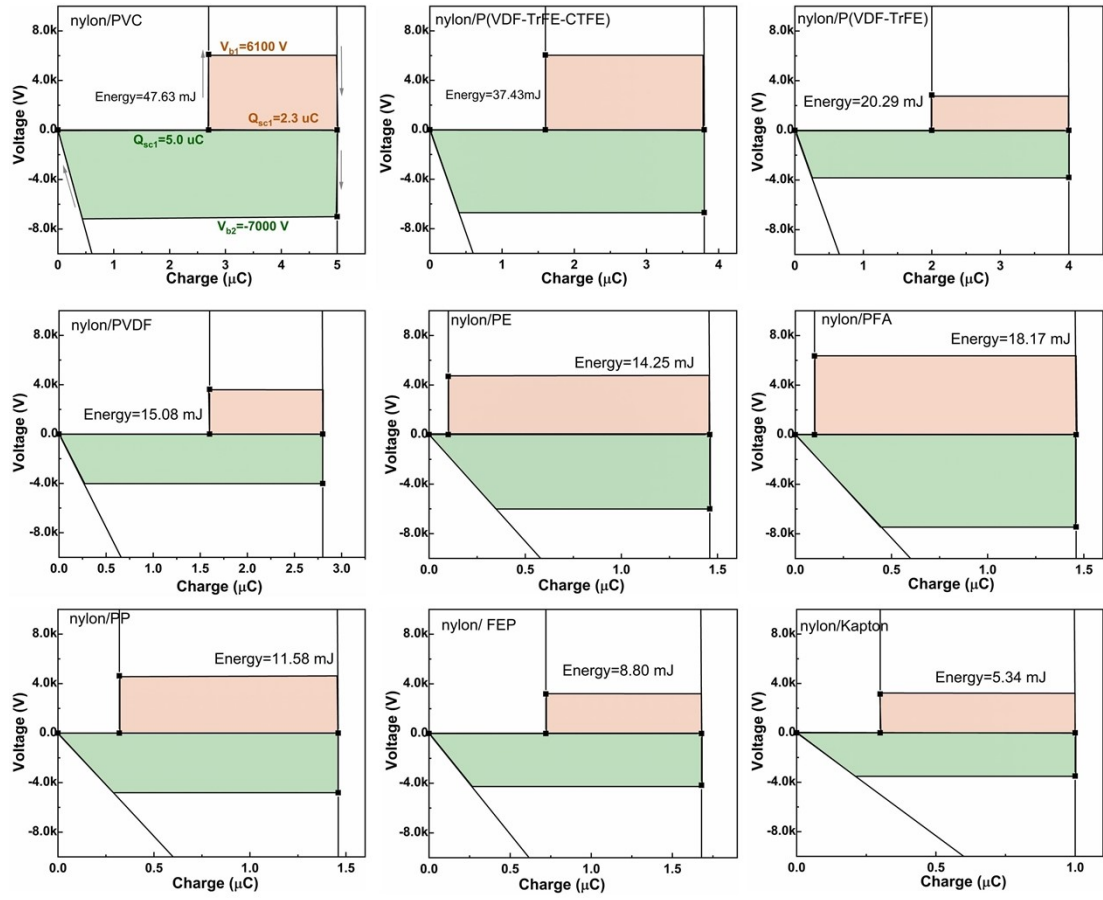

**Supplementary Figure 14.** The revised  $V$ - $Q$  curve of SFT-TENG with nylon/dielectrics for the determination of maximized energy output.

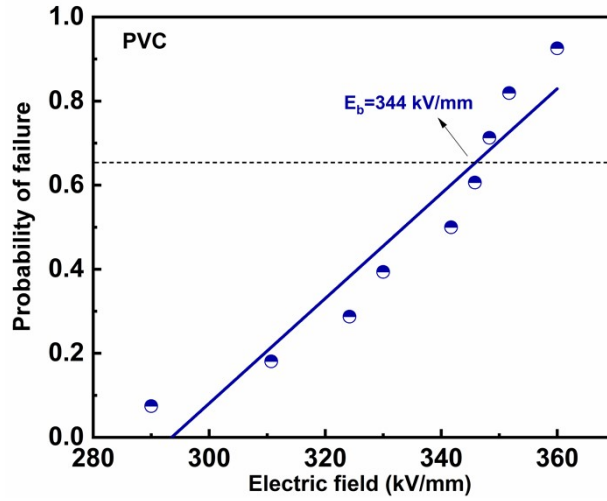

**Supplementary Figure 15.** The electric breakdown strength of PVC polymer measured by a dielectric voltage-withstand tests.

The electric breakdown strength of PVC polymer is a key parameter, which need to be given in COMSOL simulation for the judgment of breakdown point. Here it was measured by a dielectric voltage-withstand test. The DC voltage are exerted on the polymer with rising step of 500V until breakdown occurs. The breakdown voltage at this time divide by the polymer thickness is the electric breakdown field. The electric breakdown strength ( $E_b$ ) is analyzed using a two-parameter weibull cumulative probability function:

$$P(E) = 1 - \exp\left[-(E/E_b)^\beta\right] \quad (1)$$

where  $P(E)$  is the cumulative probability of failure occurring at the electric field lower or equal to  $E$ . The  $E_b$  is the scale parameter for experimental breakdown strength with a 63.2% probability for failure, and  $\beta$  is the shape parameter associated with linear regressive fit of the data distribution. The dielectric breakdown strength of PVC polymer is then extracted from a fit using Weibull failure statistics across 9 test samples.

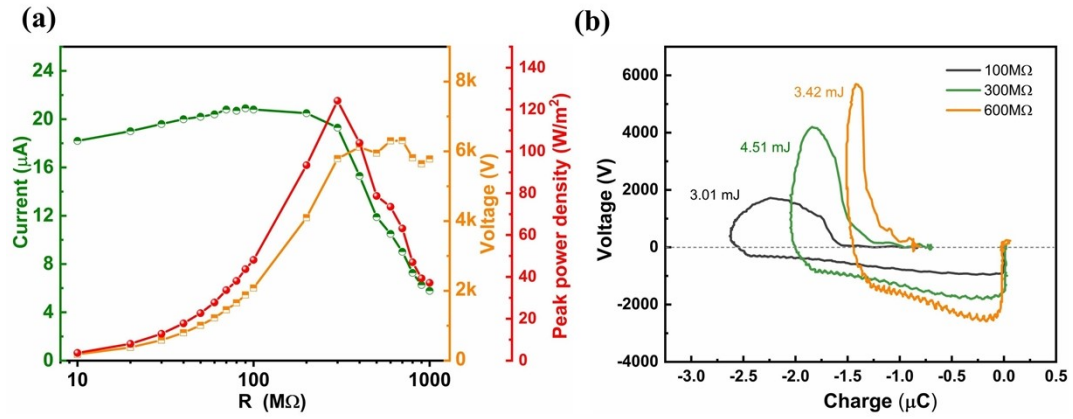

**Supplementary Figure 16.** The matching impedance and output peak power evaluation of SFT-TENG. (b) The  $V$ - $Q$  curve of TENG under varied loads. The output current and voltage at different resistances from 10 M $\Omega$  to 1 G $\Omega$  are depicted. The maximum peak power density ( $P_{peak}$ ) is 124.2 W/m<sup>2</sup> at a matching impedance of 300 M $\Omega$ . The output energy of TENG reaches 3.01 mJ, 4.51 mJ, and 3.42 mJ with an external load of 100M, 300 M $\Omega$ , and 600 M $\Omega$ , respectively.



**Supplementary Table 1** The manufacturer of the different triboelectric materials

|                  | Material                                                                  | Manufacture                                              | Thickness<br>( $\mu\text{m}$ ) |
|------------------|---------------------------------------------------------------------------|----------------------------------------------------------|--------------------------------|
| PTFE             | Polytetrafluoroethylene                                                   | Shenzhen Chenguang Plastic Industry Co., Ltd, China      | 30                             |
| FEP              | Fluorinated ethylene propylene                                            | Guangzhou Jufu Plastic Industry Co., Ltd, China          | 20                             |
| PVC              | Polyvinyl Chloride                                                        | Shenzhen Zhitong Material Technology Co., Ltd, China     | 38                             |
| PVDF             | Poly (vinylidene fluoride)                                                | home-made*                                               | 21                             |
| P(VDF-TrFE)      | Poly (vinylidene fluoride-co-trifluoroethylene)                           | home-made*                                               | 20                             |
| P(VDF-TrFE-CTFE) | Poly(vinylidene fluoride-co-trifluoroethylene-co-chlorotrifluoroethylene) | home-made*                                               | 20                             |
| Kapton           | Polyimide                                                                 | Dongguan Innovative Electronic Materials Co., Ltd, China | 22                             |
| PET              | Polyethylene terephthalate                                                | Dongguan Innovative Electronic Materials Co., Ltd, China | 20                             |
| PMMA             | Poly (methyl methacrylate)                                                | home-made*                                               | 20                             |
| PE               | Polyethylene                                                              | Shenzhen Meijianan Plastic Film Co., Ltd, China          | 30                             |
| PEEK             | Polyetheretherketone                                                      | Shenzhen Meideyuan Plastic Industry Co., Ltd, China      | 25                             |
| PFA              | Polyfluoroalkoxy                                                          | Shenzhen Chengnuoxin Plastic Industry Co., Ltd, China    | 50                             |
| PP               | Polypropylene                                                             | Fujian Yongheng Plastic Industry Co., Ltd, China         | 25                             |
| Glass fiber      | FR-4                                                                      | Hongtaiyang Plastic Industry Co., Ltd, China             | 60                             |
| Oil paper        | Nomex T410                                                                | Shenzhen Beizheng Insulation Industry Co., Ltd, China    | 20                             |
| Mica             | -                                                                         | Guangzhou Beilong Electronics Co., Ltd                   | 28                             |
| Nylon            | Polyamide                                                                 | Dongguan Yuxin Plastic Industry Co., Ltd, China          | 25                             |
| TPU              | Thermoplastic polyurethanes                                               | Dongguan Jiaxin Plastic Industry Co., Ltd, China         | 23                             |

\*: The polymer films noted as “home-made” are fabricated by a common solution casting

method due to not easy to be commercially purchased. The prepare process is present in

Supplementary Note 2.

**Supplementary Table 2** Parameters for the calculation of theoretical energy density for some  
commonly used tribomaterials

| Dielectrics | $\varepsilon_r$ | $E_b$ (MV/m) | $U_e$ (J/m <sup>3</sup> ) |
|-------------|-----------------|--------------|---------------------------|
| PTFE        | 2.2             | 400          | $3.1 \times 10^6$         |
| FEP         | 2.5             | 375          | $3.2 \times 10^6$         |
| Kapton      | 3.4             | 314          | $2.7 \times 10^6$         |
| PE          | 2.5             | 420          | $3.9 \times 10^6$         |
| PVDF        | 8.0             | 430          | $1.3 \times 10^7$         |

**Supplementary Table 3** Parameters for the simulation of electric potential and electric field distribution of the TENG in air and oil environments.

| Mode parts           | Size                    | Relative permittivity | Surface charge density |
|----------------------|-------------------------|-----------------------|------------------------|
| Slider layer (Nylon) | 30×30×0.1 mm            | 6.2                   | 233 uC/m <sup>2</sup>  |
| Stator layer (PVC)   | 70×30×0.1 mm            | 5.6                   | -100 uC/m <sup>2</sup> |
| Electrode (Cu)       | 30×30×0.1 mm            | -                     | -                      |
| Electrode gap        | 10×30×0.1 mm            | 5.6                   | -                      |
| Air                  | Surrounding environment | 1                     | -                      |
| Oil                  | Surrounding environment | 2.6                   | -                      |

**Supplementary Table 4** The parameters of geometrical physical model for COMSOL simulation

| Mode parts                    | Size                    | Relative permittivity |
|-------------------------------|-------------------------|-----------------------|
| Electrode (Cu)                | 30×30*0.1 mm            | -                     |
| Stator dielectric layer (PVC) | 70×30*0.1 mm            | 5.6                   |
| Slider layer ( nylon )        | 30×30*0.1 mm            | 6.2                   |
| Electrode gap                 | 10×30*0.1 mm            | 5.6                   |
| Air                           | Surrounding environment | 1                     |
| Oil                           | Surrounding environment | 2.6                   |

**Supplementary Table 5** The structure parameters and output performance comparison with the reported TENG

|   | Mode          | Strategy                                                      | Electrode size                           | Dielectric material                            | Charge or charge density <sup>3#</sup> ( $\mu\text{C}/\text{m}^2$ ) | Output voltage <sup>3#</sup> | Average power <sup>2#</sup>   | Energy <sup>1#</sup> | Volume energy density ( $\text{J}/\text{m}^3$ ) | Ref. |
|---|---------------|---------------------------------------------------------------|------------------------------------------|------------------------------------------------|---------------------------------------------------------------------|------------------------------|-------------------------------|----------------------|-------------------------------------------------|------|
| 1 | SFT (Rotary)  | Floating self-excited                                         | 23.3 $\text{cm}^2 \times 12$ fans        | 25 $\mu\text{m}$ nylon; 30 $\mu\text{m}$ PTFE  | 71.5                                                                | 470V (10 M $\Omega$ )        | -                             | -                    | 1222                                            | [1]  |
| 2 | SFT (Sliding) | Non-contact mode                                              | 3.5 $\times$ 7.5 $\text{cm}^2$ ; Gap=3mm | 50 $\mu\text{m}$ PTFE                          | 260.15                                                              | 3879V                        | -                             | -                    | 14119                                           | [2]  |
| 3 | SFT (Sliding) | Self-excited liquid suspension                                | 6.6 $\times$ 4.8 $\text{cm}^2$ ; Gap=8mm | 25 $\mu\text{m}$ nylon; 25 $\mu\text{m}$ nylon | 704                                                                 | 4200V (1 G $\Omega$ )        | -                             | -                    | 54587                                           | [3]  |
| 4 | SFT (Sliding) | Charge space-accumulation effect                              | 7.65 $\times$ 3.5 $\text{cm}^2$          | 25 $\mu\text{m}$ nylon; 50 $\mu\text{m}$ PTFE  | 1630                                                                | 3000V (10G $\Omega$ )        | -                             | -                    | 25568                                           | [4]  |
| 5 | SFT (Sliding) | Interfacial lubrication and potential decentralization design | 2.1 $\times$ 5 $\text{cm}^2$ Gap: 0.2cm  | 25 $\mu\text{m}$ nylon; 33 $\mu\text{m}$ PTFE  | 1960                                                                | 2350V (10 G $\Omega$ )       | -                             | -                    | 70250                                           | [5]  |
| 6 | SFT (Rotary)  | AC and DC coupling output                                     | R-r: 8.4-1.5 cm                          | 25 $\mu\text{m}$ nylon; 33 $\mu\text{m}$ PTFE  | -                                                                   | -                            | 5.74 W/ $\text{m}^2$ Hz (1Hz) | -                    | 98965                                           | [6]  |
| 7 | SFT (Sliding) | Charge pumping with voltage stabilization and boosted current | 7.5 $\times$ 10 $\text{cm}^2$            | 50 $\mu\text{m}$ PET; 50 $\mu\text{m}$ Kapton  | 1328                                                                | 1400V (200 M $\Omega$ )      | -                             | -                    | 37100                                           | [7]  |

|    |                  |                                                              |                       |                         |      |                   |                                  |                                  |       |      |
|----|------------------|--------------------------------------------------------------|-----------------------|-------------------------|------|-------------------|----------------------------------|----------------------------------|-------|------|
| 8  | SFT<br>(Rotary)  | Charge<br>pumping                                            | R-r: 22-3.5cm         | 50μm Kapton             | -    | -                 | 78 mW (2Hz)                      | -                                | 21051 | [8]  |
| 9  | SFT<br>(Sliding) | Charge<br>migration for<br>volume effect                     | 2×5 cm <sup>2</sup>   | 1mm PU;<br>100μm FEP    | -    | 3000V             | -                                | 1.2 mJ<br>(1.2GΩ)                | 991   | [9]  |
| 10 | SFT<br>(Sliding) | Hysteretic<br>and ordered<br>charge<br>migration             | R-r: 7.2-1.3cm        | 50μm FEP;<br>1mm PU     | -    | -                 | 14.1 W/m <sup>2</sup><br>(1.5Hz) | -                                | 8952  | [10] |
| 11 | SFT<br>(Sliding) | Charge<br>leakage and<br>ternary<br>dielectric<br>evaluation | 25um PA;<br>50um PTFE |                         | -    | -                 | 6.1 W/(m <sup>2</sup> Hz)        | -                                | 82000 | [11] |
| 12 | CS               | Charge-<br>shuttling                                         | 10×10 cm <sup>2</sup> | 5μm PP                  | 1850 | -                 | 1.4 mW,<br>(1.7Hz)               | -                                | 16470 | [12] |
| 13 | CS               | High vacuum<br>environments                                  | 3×3 cm <sup>2</sup>   | 0.6cm BT;<br>200μm PTFE | 1003 | 300V              | 50 W m <sup>-2</sup> , (2Hz)     | -                                | 3472  | [13] |
| 14 | CS               | charge-<br>excitation                                        | 10cm <sup>2</sup>     | 50μm PTFE;<br>20μm Al   | 1250 | 800V<br>(100 MΩ)  | 38.2 W/m <sup>2</sup><br>(4Hz)   |                                  | 9095  | [14] |
| 15 | CS               | Charge-<br>excitation                                        |                       | 4μm PEI                 | 2380 | 1200V<br>(100 MΩ) |                                  | 287.6 mJ/m <sup>2</sup><br>(3MΩ) | 71900 | [15] |
| 16 | CS               | Self-charge<br>excitation with<br>P(VDF-TrFE)                | 2×2 cm <sup>2</sup>   | 9μm P(VDF-<br>TrFE)     | 2200 | 1000V             | 40 W/m <sup>2</sup><br>(2.5 Hz)  | -                                | 4360  | [16] |

|    |    |                                           |                         |                                |      |                |                                  |                                        |       |      |
|----|----|-------------------------------------------|-------------------------|--------------------------------|------|----------------|----------------------------------|----------------------------------------|-------|------|
| 17 | CS | Self-Polarization Effect                  | 3×3 cm <sup>2</sup>     | 7.5μm BaTiO <sub>3</sub> /PVDF | 1670 | 600V (100 MΩ)  | -                                | 44.736 J/m <sup>3</sup> (Distance 6mm) | 268   | [17] |
| 18 | CS | Polar high-k material                     | 3×3 cm <sup>2</sup>     | 7.5μm PZT+PVDF;                | 3530 | 500V (10 MΩ)   | 145.2 W/m <sup>2</sup> (4Hz)     | -                                      | 36011 | [18] |
| 19 | CS | Charge injection enabled by air breakdown | 3×3 cm <sup>2</sup>     | 30μm PTFE                      | 880  | 650V (100 MΩ)  | -                                | -                                      | 1110  | [19] |
| 20 | CS | Water molecules induced self-polarization | 2.5×2.5 cm <sup>2</sup> | 10μm P(VDF-TrFE)               | 2880 | 600V (100 MΩ)  | -                                | -                                      | 3421  | [20] |
| 21 | CS | Charge pumping                            | 12×12 cm <sup>2</sup>   | 5μm PP                         | 1020 | 1000V (100 MΩ) | 200 mW, (0.5 Hz)                 | -                                      | 27639 | [21] |
| 22 | CS | charge trapping failure                   | 2.5×2.5 cm <sup>2</sup> | 10μm CP/PVDF                   | 4130 | 700V (10MΩ)    | 58.2 W/(m <sup>2</sup> Hz) (4Hz) | -                                      | 57623 | [22] |
| 23 | CS | charge reversion process                  | 2.7×2.7 cm <sup>2</sup> | 30μm PI                        | 780  | -              | -                                | 190 mJ/m <sup>2</sup>                  | 6333  | [23] |

# The evaluation method of maximized volume energy density is discussed in Supplementary Note 2.

**Supplementary Note 1:** The fabrication process of several home-made polymer films.

For the fabrication of PVDF, P(VDF-TrFE), and P(VDF-TrFE-CTFE) film, the raw powders were proportionally (10 wt.%) added in N, N-dimethylformamide solvent and stirred at 60°C for 6h to form a stable and homogeneous solution. Then the solution was poured on a clear glass substrate followed by tape casting by a scraper with a clearance of 400um. After drying at 80°C for 12h to volatilize the solvent, the polymer films with a thickness of ~20 µm were obtained to serve as tribomaterials for the TENG device.

For the fabrication of PMMA film, the raw powders were proportionally (20wt.%) added in N, N-dimethylformamide to the prepared solution. The tape casting using a scraper with a clearance of 300um to obtain films with a thickness of ~20 µm.



**Supplementary Note 2: The preliminary test of SFT-TENG with different combinations of Nylon and PTFE as slider and stator materials, respectively.**

The purpose of preliminarily testing in Supplementary Figure 5 is to explore the correlation between material properties and triboelectric/excitation charge output through different combinations of Nylon and PTFE as slider and stator materials, respectively. 1) Triboelectrification: Firstly, the triboelectrification reaches stability after several cycles of reciprocating sliding motion, shown as the initial curve part marked by a dashed circle, which represents only the triboelectric charge output. It can be observed that the tribomaterial pairs of Nylon/PTFE and PTFE/Nylon with large electronegativity difference show high triboelectric charges of ~200 nC compared with that of ~20 nC and ~10 nC for identical tribomaterial pairs of PTFE/PTFE and Nylon/Nylon. 2) Apply HV. Then, the positive and negative electrodes of the HV source are connected to the back electrode of the slider, and one of the bottom electrodes, respectively. Here, an external high voltage was applied to the TENG with an increasing step of 500V, while the corresponding  $Q_{sc}$  varies with voltage as shown in Supplementary Figure 5. For instance, the identical tribomaterial pair of PTFE/PTFE (as the slider/stator, respectively) achieves the  $Q_{sc}$  of 330 nC after experiencing the high voltage of 5000V, which mainly originated from the HV excitation. The TENG with Nylon/PTFE pair yields a much higher  $Q_{sc}$  of 700 nC due to the synergetic contributions from triboelectric charges and excitation charges. However, the TENG with PTFE/Nylon presents decreased  $Q_{sc}$  with the increased voltage step each time due to the competition between negative triboelectric charges from the slider PTFE and positive excitation charges. 3) Remove HV. Last, owing to

the high dielectric loss and leakage characteristics of Nylon, a very drifting charge curve is observed in the TENG with the Nylon/Nylon pair with almost no excitation effect.

**Supplementary Note 3:** Evaluation of maximized energy density for other reported work.

Although many research works have reported charge density or energy output performance of TENG, there are few direct numerical values on the maximized energy density. It is necessary to compare and analyze the detailed parameter from other literature to estimate their maximized energy density output capability. It should be noted that the calculation of the effective volume ( $V$ ) is different for CS-TENG and SFT-TENG. For SFT-TENG,  $V$  is calculated as sliding area multiplied by the thickness of all stator and slider dielectrics layer. While for CS-TENG, it is given as electrode area multiplied by the sum of dielectrics layer thickness and separation distance. Here separation distance of 1 mm is assumed if not given clearly in the literature.

Here, three types of output parameters are considered to evaluate the maximized volume energy density. First, energy output ( $E$ ) can be directly adopted to calculate  $U_m$  according to the equation (1)

$$U_m = E/V \quad (2)$$

Second, average power  $P_{ave}$  is used to calculate  $U_m$  referring to the equation (2)

$$U_m = P_{ave}/fV \quad (3)$$

where,  $f$  is working Frequency of TENG.

Third, charge ( $Q_{sc}$ ) and maximum output voltage ( $V_{max}$ ) are considered to imitate  $V$ - $Q$  curve, so the  $E_m$  can be given as:

$$E_m = 2Q_{sc}V_{max}/V \quad (4)$$

## Reference

1. Long L, et al. High performance floating self-excited sliding triboelectric nanogenerator for micro mechanical energy harvesting. *Nature Communications* 12, 4689 (2021).
2. Lei R, et al. Largely Enhanced Output of the Non-Contact Mode Triboelectric Nanogenerator via a Charge Excitation Based on a High Insulation Strategy. *Advanced Energy Materials* 12, 2201708 (2022).
3. He W, et al. Large Harvested Energy by Self-Excited Liquid Suspension Triboelectric Nanogenerator with Optimized Charge Transportation Behavior. *Advanced Materials* 35, 2209657 (2023).
4. Gao Y, et al. Achieving high-efficiency triboelectric nanogenerators by suppressing the electrostatic breakdown effect. *Energy & Environmental Science* 16, 2304-2315 (2023).
5. He W, et al. Ultrahigh Performance Triboelectric Nanogenerator Enabled by Charge Transmission in Interfacial Lubrication and Potential Decentralization Design. *Research* 2022.
6. He W, et al. Capturing Dissipation Charge in Charge Space Accumulation Area for Enhancing Output Performance of Sliding Triboelectric Nanogenerator. *Advanced Energy Materials* 12, 2201454 (2022).
7. Yang Z, et al. Charge Pumping for Sliding-mode Triboelectric Nanogenerator with Voltage Stabilization and Boosted Current. *11*, 2101147 (2021).
8. Bai Y, et al. Charge Pumping Strategy for Rotation and Sliding Type Triboelectric Nanogenerators. *Advanced Energy Materials* 10, 2000605 (2020).

9. Fu S, et al. Conversion of Dielectric Surface Effect into Volume Effect for High Output Energy. *Advanced Materials* 35, 2302954 (2023).
10. Wu H, et al. A constant current triboelectric nanogenerator achieved by hysteretic and ordered charge migration in dielectric polymers. *Energy & Environmental Science* 16, 5144-5153 (2023).
11. Li Q, et al. Overall performance improvement of direct-current triboelectric nanogenerators by charge leakage and ternary dielectric evaluation. *Energy & Environmental Science* 16, 3514-3525 (2023).
12. Wang H, Xu L, Bai Y, Wang ZL. Pumping up the charge density of a triboelectric nanogenerator by charge-shuttling. *Nature Communications* 11, 4203 (2020).
13. Wang J, et al. Achieving ultrahigh triboelectric charge density for efficient energy harvesting. *Nature Communications* 8, 88 (2017).
14. Liu W, et al. Integrated charge excitation triboelectric nanogenerator. *Nature Communications* 10, 1426 (2019).
15. Liu Y, et al. Quantifying contact status and the air-breakdown model of charge-excitation triboelectric nanogenerators to maximize charge density. *Nature Communications* 11, 1599 (2020).
16. Li Y, et al. Improved Output Performance of Triboelectric Nanogenerator by Fast Accumulation Process of Surface Charges. *Advanced Energy Materials* 11, 2100050 (2021)

17. Wang J, et al. An Ultrafast Self-Polarization Effect in Barium Titanate Filled Poly(Vinylidene Fluoride) Composite Film Enabled by Self-Charge Excitation Triboelectric Nanogenerator. *Advanced Functional Materials* 32, 2204322 (2022).
18. Wu H, et al. Achieving Remarkable Charge Density via Self-Polarization of Polar High-k Material in a Charge-Excitation Triboelectric Nanogenerator. *Advanced Materials* 34, 2109918 (2022).
19. Wu H, et al. Improving and Quantifying Surface Charge Density via Charge Injection Enabled by Air Breakdown. *Advanced Functional Materials* 32, 2203884 (2022).
20. Wang J, et al. Enhancement of output charge density of TENG in high humidity by water molecules induced self-polarization effect on dielectric polymers. *Nano Energy* 104, 107916 (2022).
21. Xu L, Bu TZ, Yang XD, Zhang C, Wang ZL. Ultrahigh charge density realized by charge pumping at ambient conditions for triboelectric nanogenerators. *Nano Energy* 49, 625-633 (2018).
22. Wu H, et al. Ultrahigh output charge density achieved by charge trapping failure of dielectric polymers. *Energy & Environmental Science* 16, 2274-2283 (2023).
23. Guo Z, et al. Achieving a highly efficient triboelectric nanogenerator via a charge reversion process. *Energy & Environmental Science* 16, 5294-5304 (2023).
